# Supplementary material
Source: PubMed Central journal article supplement (PMC3406506)

Figure 1: Orange Vegetable Intake and Lung Cancer Risk in the NIH – AARP Study  
Log Hazard Ratios for FFQ – Reported Quintiles of Orange Vegetable Density (cups/kcal)

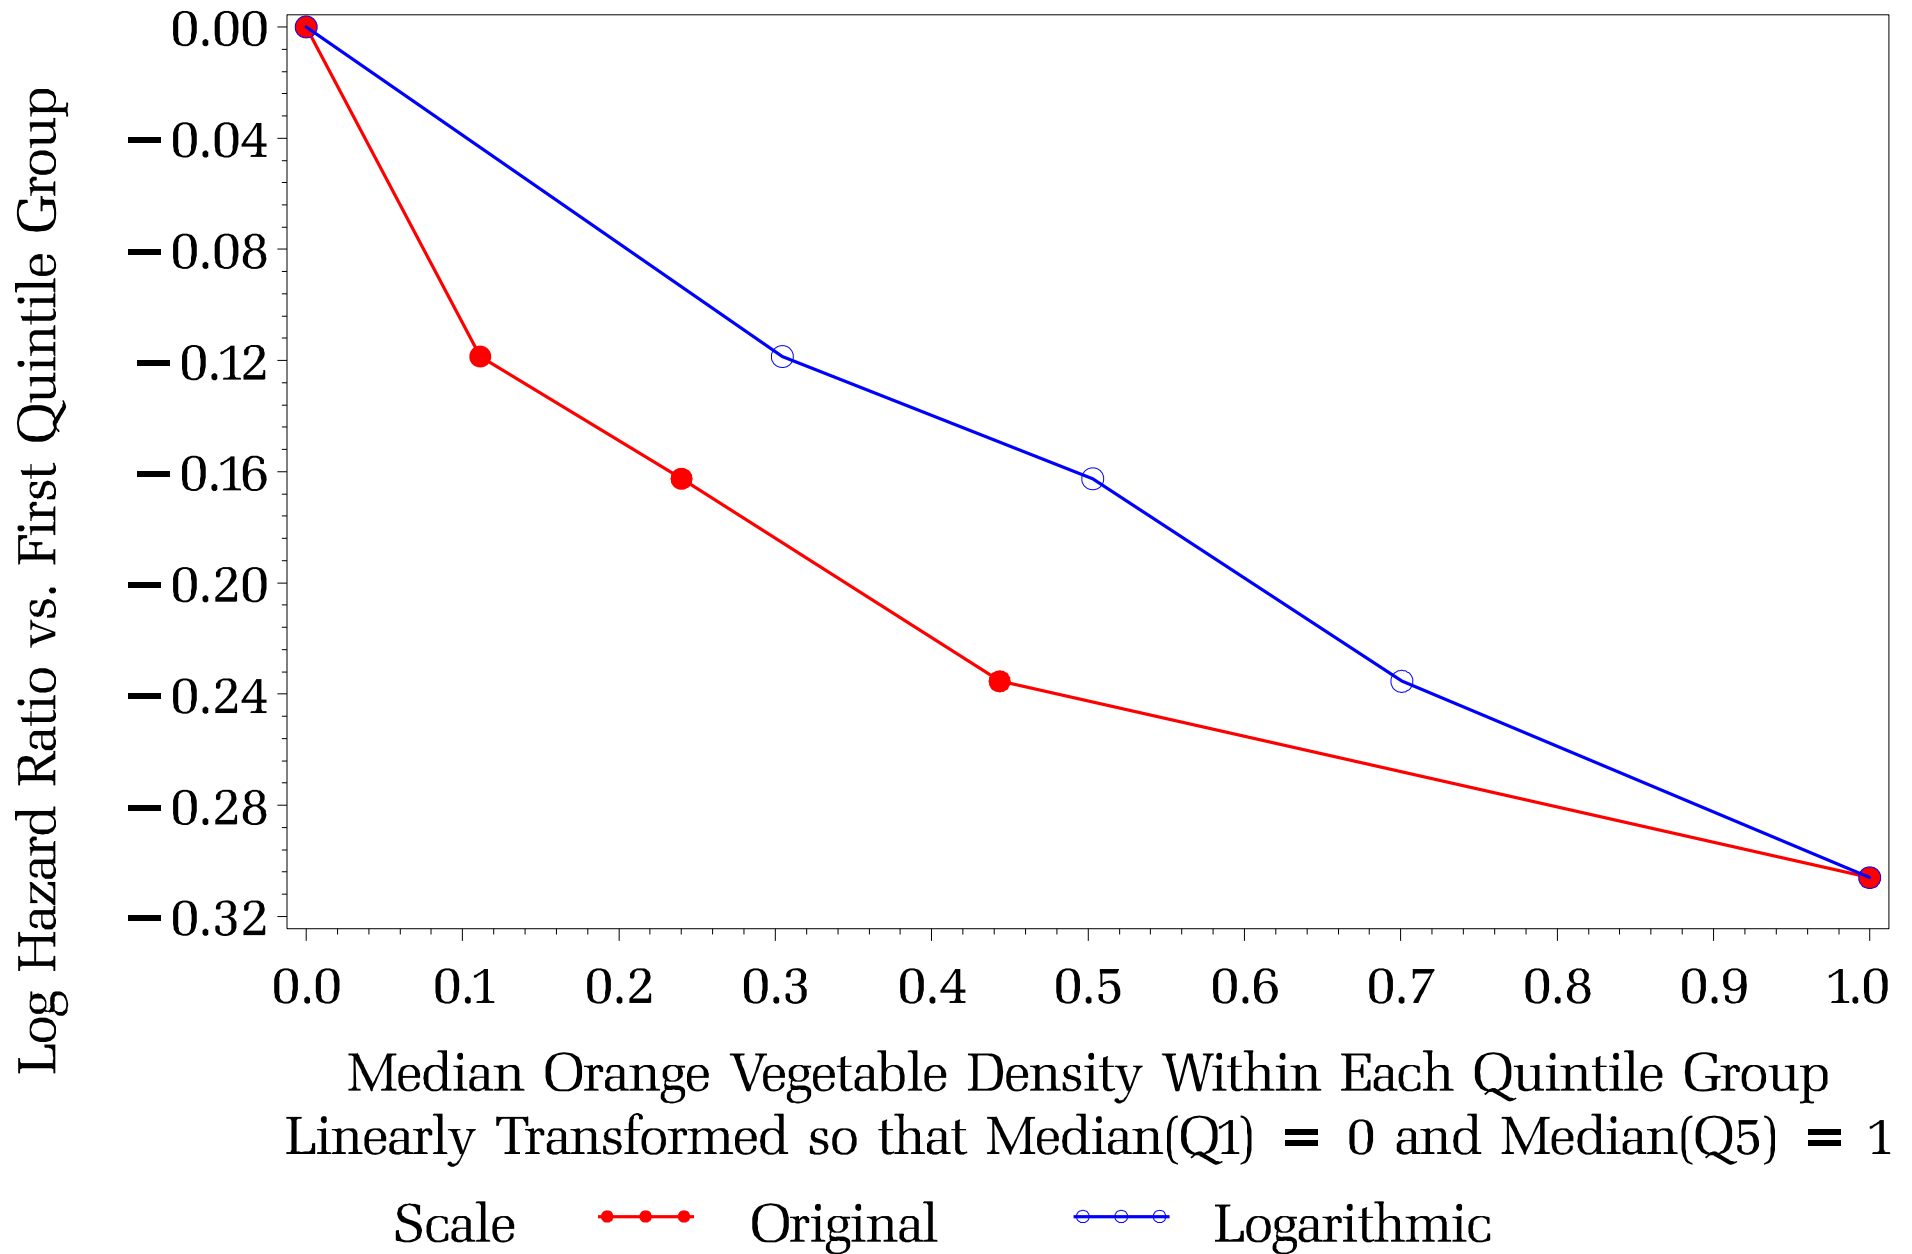

Supplement: ijb1267_supplementary_1.pdf [file ijb1267_supplementary_1.pdf]
